# Supplementary material
Source: publisher figshare collection journal article supplement (https://sage.figshare.com/ndownloader/files/20105537)

## Supplement 1. Participation and response rate of the sample

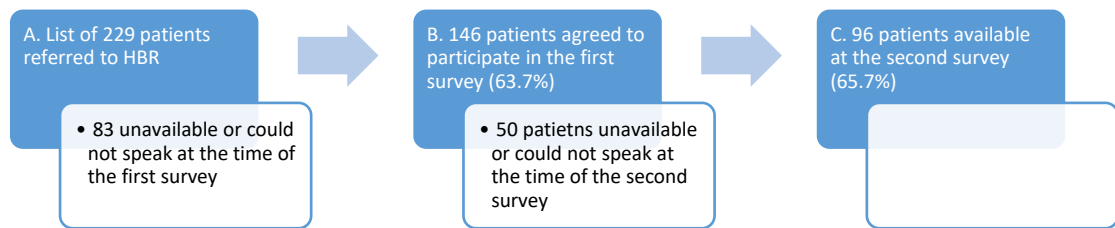

Supplement: Supplementary file 1 [file 20105537]
